# Supplementary material for: Candida auris–Associated Candidemia, South Africa
Source: PubMed Central journal article supplement (PMC4073876; doi:10.3201/eid2007.131765), 2014-07
Supplement: 13-1765-Techapp-s1.pdf [file 13-1765-Techapp-s1.pdf]

# *Candida auris*–Associated Candidemia, South Africa

## Technical Appendix

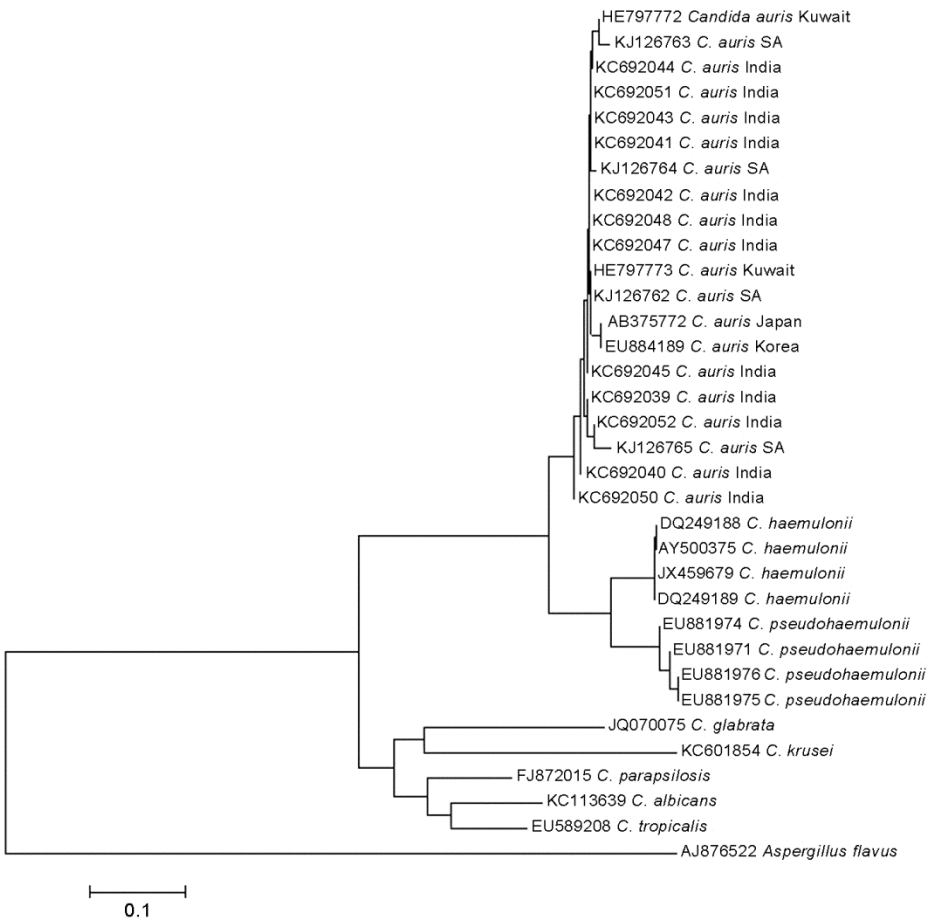

Technical Appendix Figure. Phylogenetic relatedness of internal transcribed spacer region of the ribosomal RNA gene of *Candida auris* with closely related *Candida* species. Scale bar indicates nucleotide substitutions per site.

Technical Appendix Table. Clinical characteristics of a 73-year-old male patient with candidemia caused by *Candida auris*, South Africa

| Isolate ID | Risk factor                                                                                                                                                                                                                                                                                                                                                                                                                                                                                                         | Antifungal treatment                               | Outcome                               |
|------------|---------------------------------------------------------------------------------------------------------------------------------------------------------------------------------------------------------------------------------------------------------------------------------------------------------------------------------------------------------------------------------------------------------------------------------------------------------------------------------------------------------------------|----------------------------------------------------|---------------------------------------|
| 224        | <p>Referred to a public-sector specialist burn unit from a private-sector hospital</p> <p>40% third-degree burns with inhalational injury; required débridement, skin grafts, and tracheostomy</p> <p>In situ: central venous catheter/s, arterial line, urinary catheter</p> <p>Mechanically ventilated</p> <p>Multiple episodes of sepsis requiring broad-spectrum antimicrobial drugs, including <math>\beta</math>-lactams, colistin, linezolid, and vancomycin</p> <p>Renal failure requiring hemodialysis</p> | Amphotericin B deoxycholate (received only 1 dose) | Died 35 d after admission to hospital |
